# Supplementary material for: Wafer-size growth of 2D layered SnSe films for UV-Visible-NIR photodetector arrays with high responsitivity
Source: Royal Society of Chemistry journal article supplement (doi:10.1039/d0nr00319k), 2020-01-01
Supplement: d0nr00319k1.pdf [file d0nr00319k1.pdf]

## Wafer-size growth of 2D layered SnSe films for UV-Visible-NIR Photodetector Arrays with High Responsivity

Lanzhong Hao,<sup>a</sup> Yongjun Du,<sup>a</sup> Zegao Wang,<sup>\*b,c</sup> Yupeng Wu,<sup>a</sup> Hanyang Xu,<sup>a</sup> Shichang Dong,<sup>a</sup> Hui Liu,<sup>a</sup> Yunjie Liu,<sup>\*a</sup> Qingzhong Xue,<sup>a</sup> Zhide Han,<sup>a</sup> Keyou Yan,<sup>d</sup> Mingdong Dong<sup>\*c</sup>

<sup>a</sup> School of Materials Science and Engineering, China University of Petroleum, Qingdao 266580, China

<sup>b</sup> College of Materials Science and Engineering, Sichuan University, Chengdu 610065, China

<sup>c</sup> Interdisciplinary Nanoscience Center, Aarhus University, Aarhus 8000, Denmark

<sup>d</sup> School of Environment and Energy, National Engineering Laboratory for VOCs Pollution Control Technology and Equipment, South China University of Technology, Guangzhou 510006, China

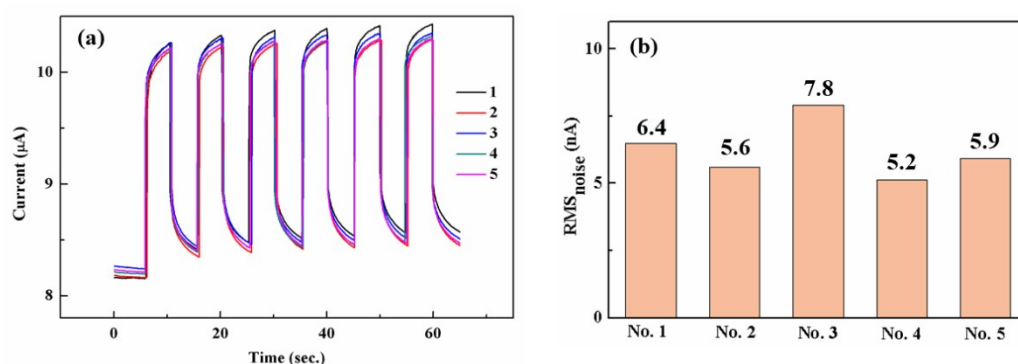

**Fig. S1** a) Dynamic response curves under 404-nm laser with 15.5 mWcm<sup>-2</sup> from five different devices. (b) The rms noise for the devices

The root-mean-square (RMS) noise was calculated from the dark currents of the above five devices based on the following equation,<sup>1</sup>

$$RMS_{noise} = \sqrt{\sum (I - I_0)^2 / N} \quad (1)$$

where  $I$  is measured dark current depending on time,  $I_0$  is the initial dark current before illumination, and  $N$  is the number of data points. As shown Fig. R1b (new Fig. S1b in Supporting Information), the RMS noise for different devices has little

deviation of 5.2 ~ 7.8 nA, and its mean is  $6.18 \pm 1.00$  nA, which are much smaller than that of the light current (about 2  $\mu$ A), indicating the high electric noise homogeneity.

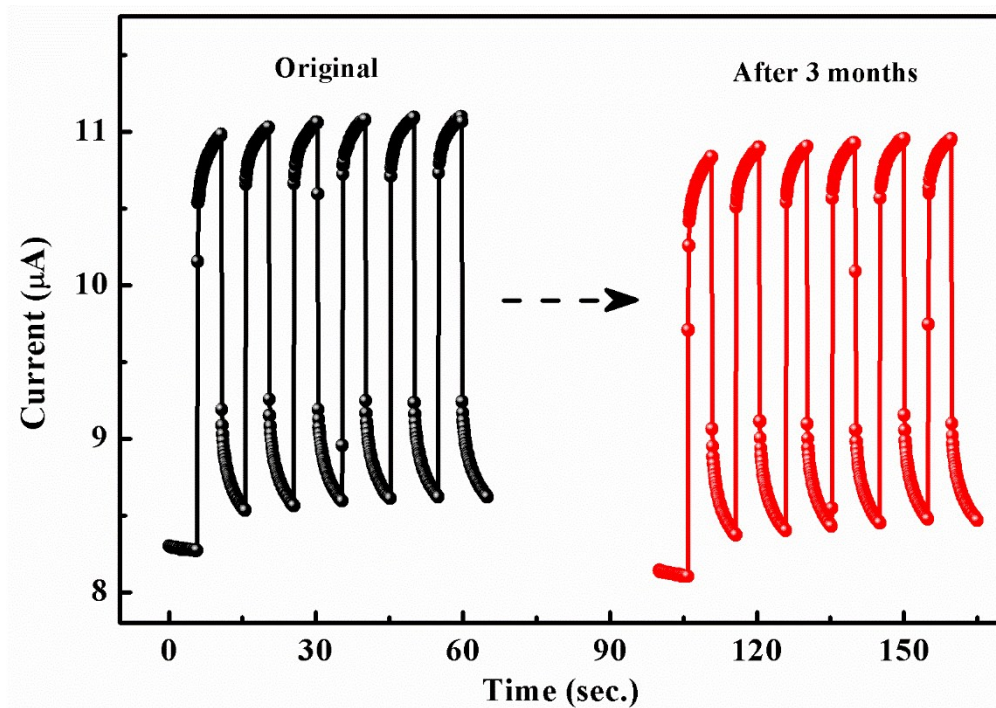

**Fig. S2** Comparison between the original and 3-month response curve. The RMS currents of original and 3-month-age are 6.9 nA and 8.7 nA, respectively, further revealing the high stability of the fabricated photodetector.

Notes and reference

- 1 C. Yim, K. Lee, N. McEvoy, M. Brien, S. Riazimehr, N. Berner, C. Cullen, J. Kotakoski, J. Meyer, M. Lemme, G. Duesberg, ACS Nano 2016, 10, 9550.
